# Supplementary material
Source: MDPI journal article supplement (https://www.mdpi.com/2073-4344/12/8/907)
Supplement: s1 [file s1]

# The Shell Matters: Self-Organized CdS-ZnS/MnS-Core-Shell - Porphyrin - Polymer Nano-Assemblies for Photocatalysis

Maximilian Wagner<sup>1</sup>, and Franziska Gröhn<sup>1,\*</sup>

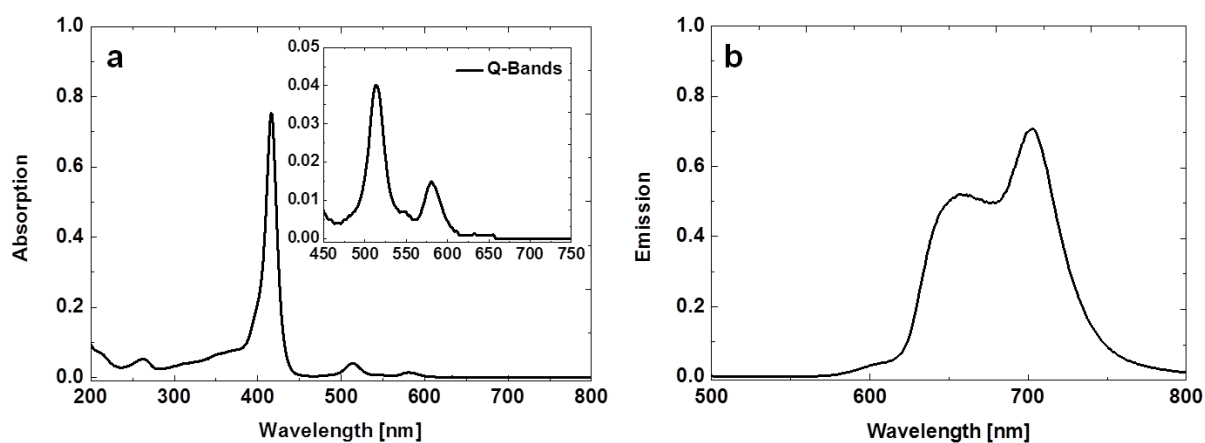

**Figure S1.** a) Absorption and b) emission spectrum of H<sub>2</sub>TAPP in water (excited at 425 nm, slit width 3 nm, integration time 0.1 s).

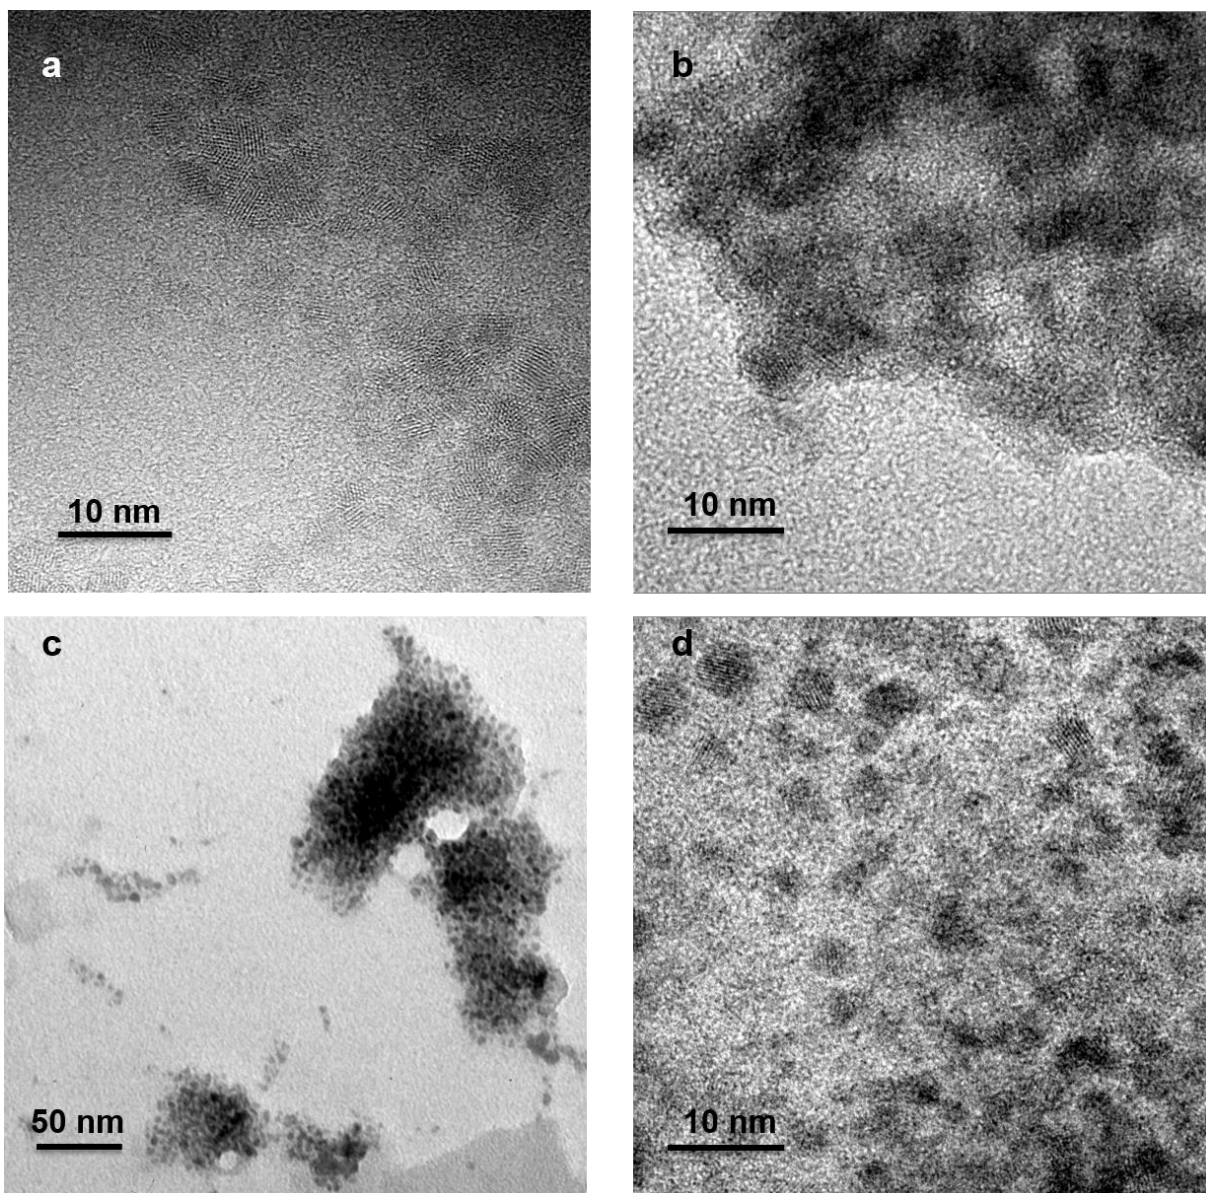

**Figure S2** a) TEM image of CdS-ZnS, b) TEM image of CdS-Zn<sub>0.5</sub>Mn<sub>0.5</sub>S, c) TEM image of CdS-Zn<sub>0.05</sub>Mn<sub>0.95</sub>S, d) TEM image of CdS-MnS.

The size of the nanoparticles was determined by measuring 25 particles. Yielding a size of 3.6 nm with a distribution of 0.6 nm for CdS-ZnS. For CdS-Zn<sub>0.5</sub>Mn<sub>0.5</sub>S yielding a size of 4.1 nm with a distribution of 0.6 nm. For CdS-Zn<sub>0.05</sub>Mn<sub>0.95</sub>S yielding a size of 4.3 nm with a distribution of 0.3 nm. For CdS-MnS yielding a size of 3.9 nm with a distribution of 0.7 nm.

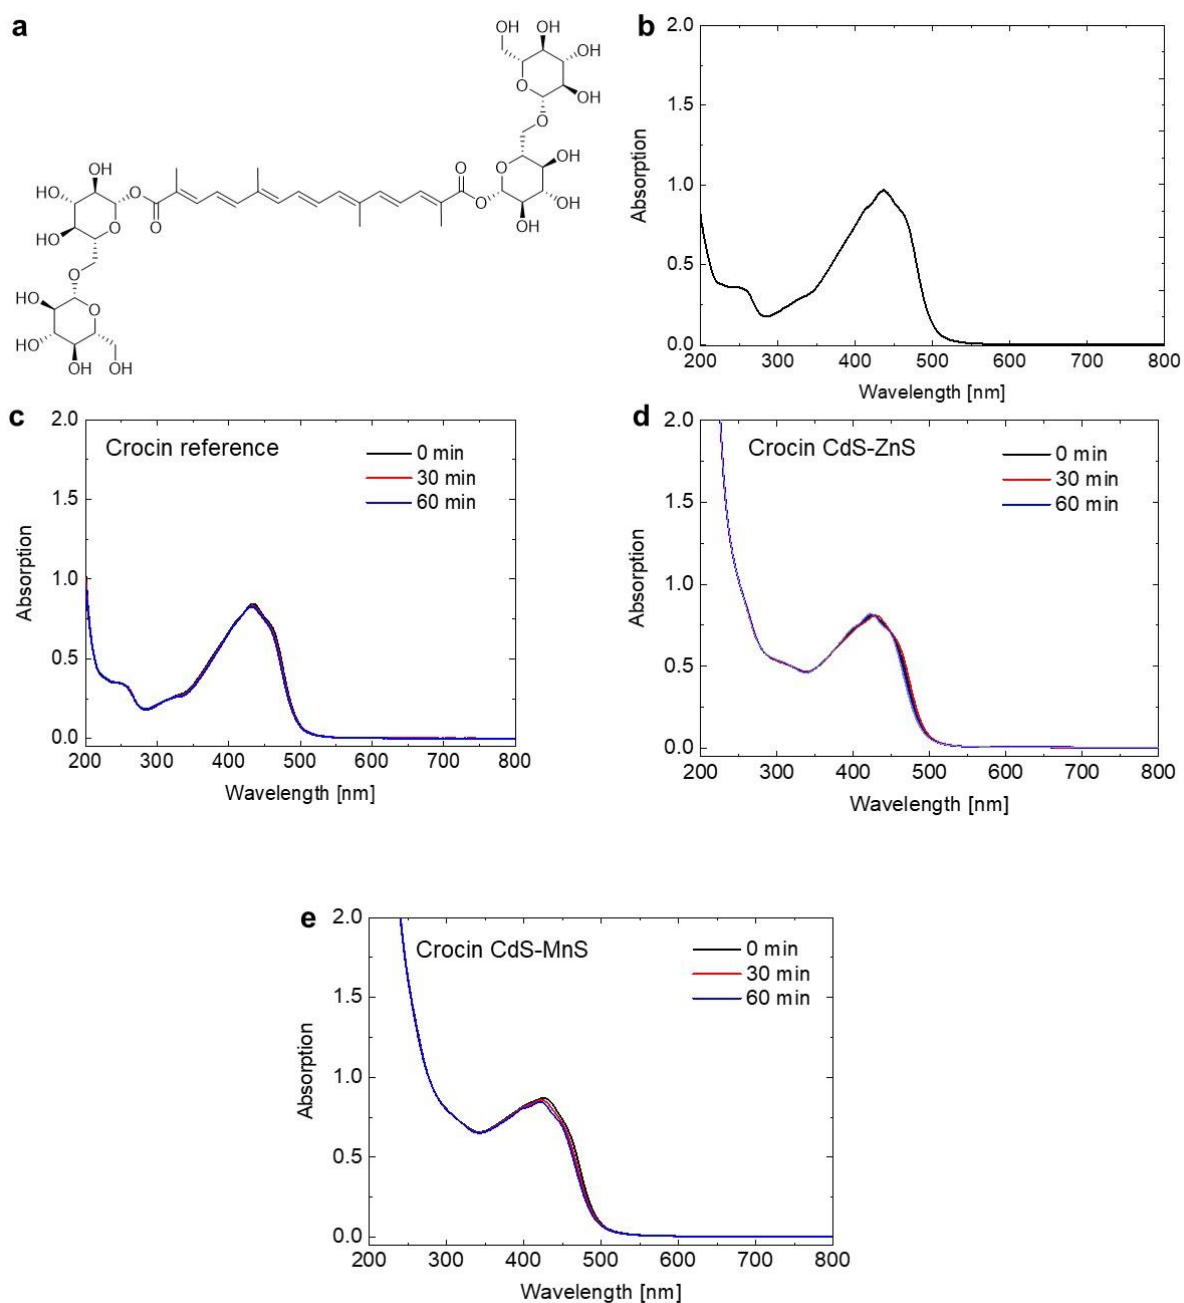

**Figure S3.** a) Chemical structure, b) absorption spectrum of crocin in water c) decomposition of crocin under irradiation without additive d) crocin degradation in presence of CdS-ZnS particles e) crocin degradation in presence of CdS-MnS particles.

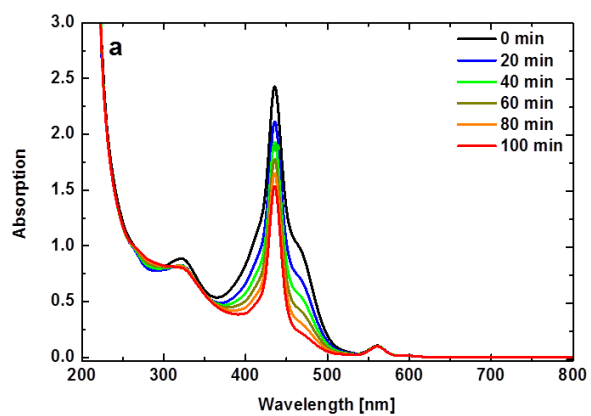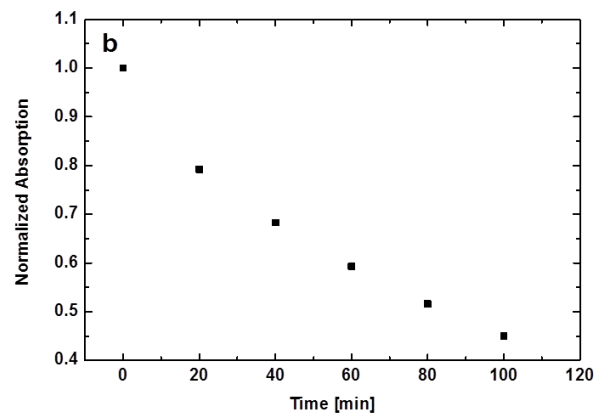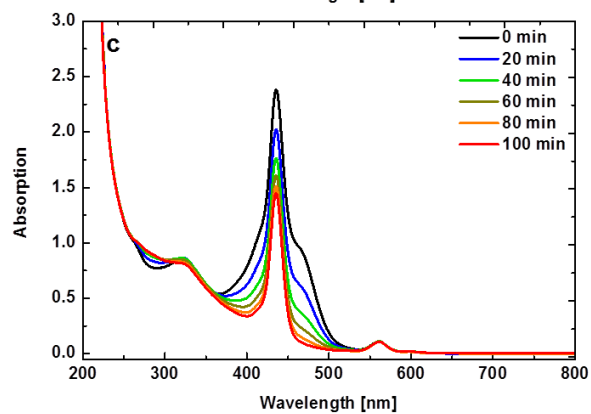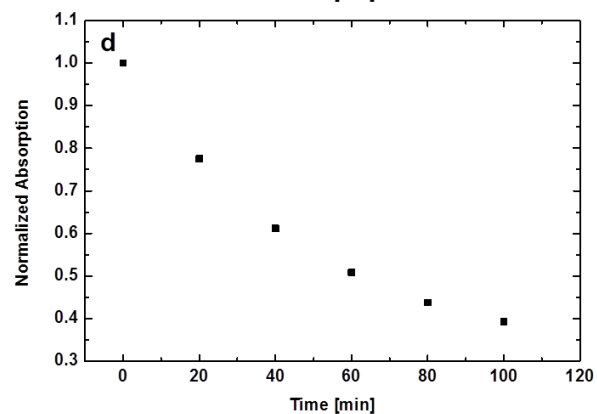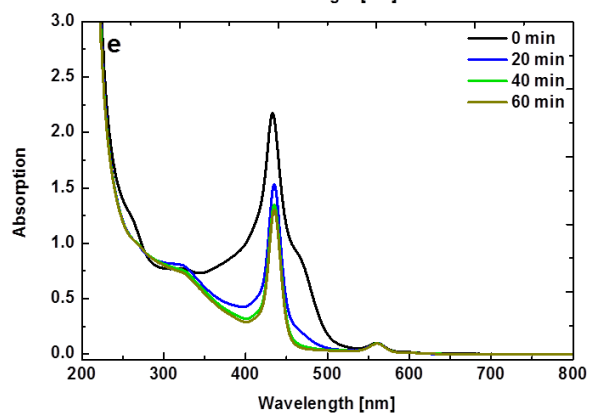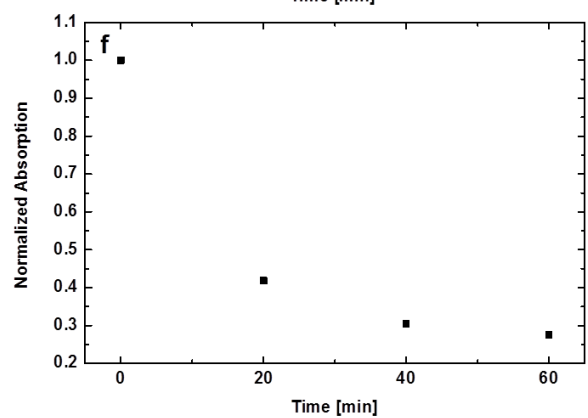

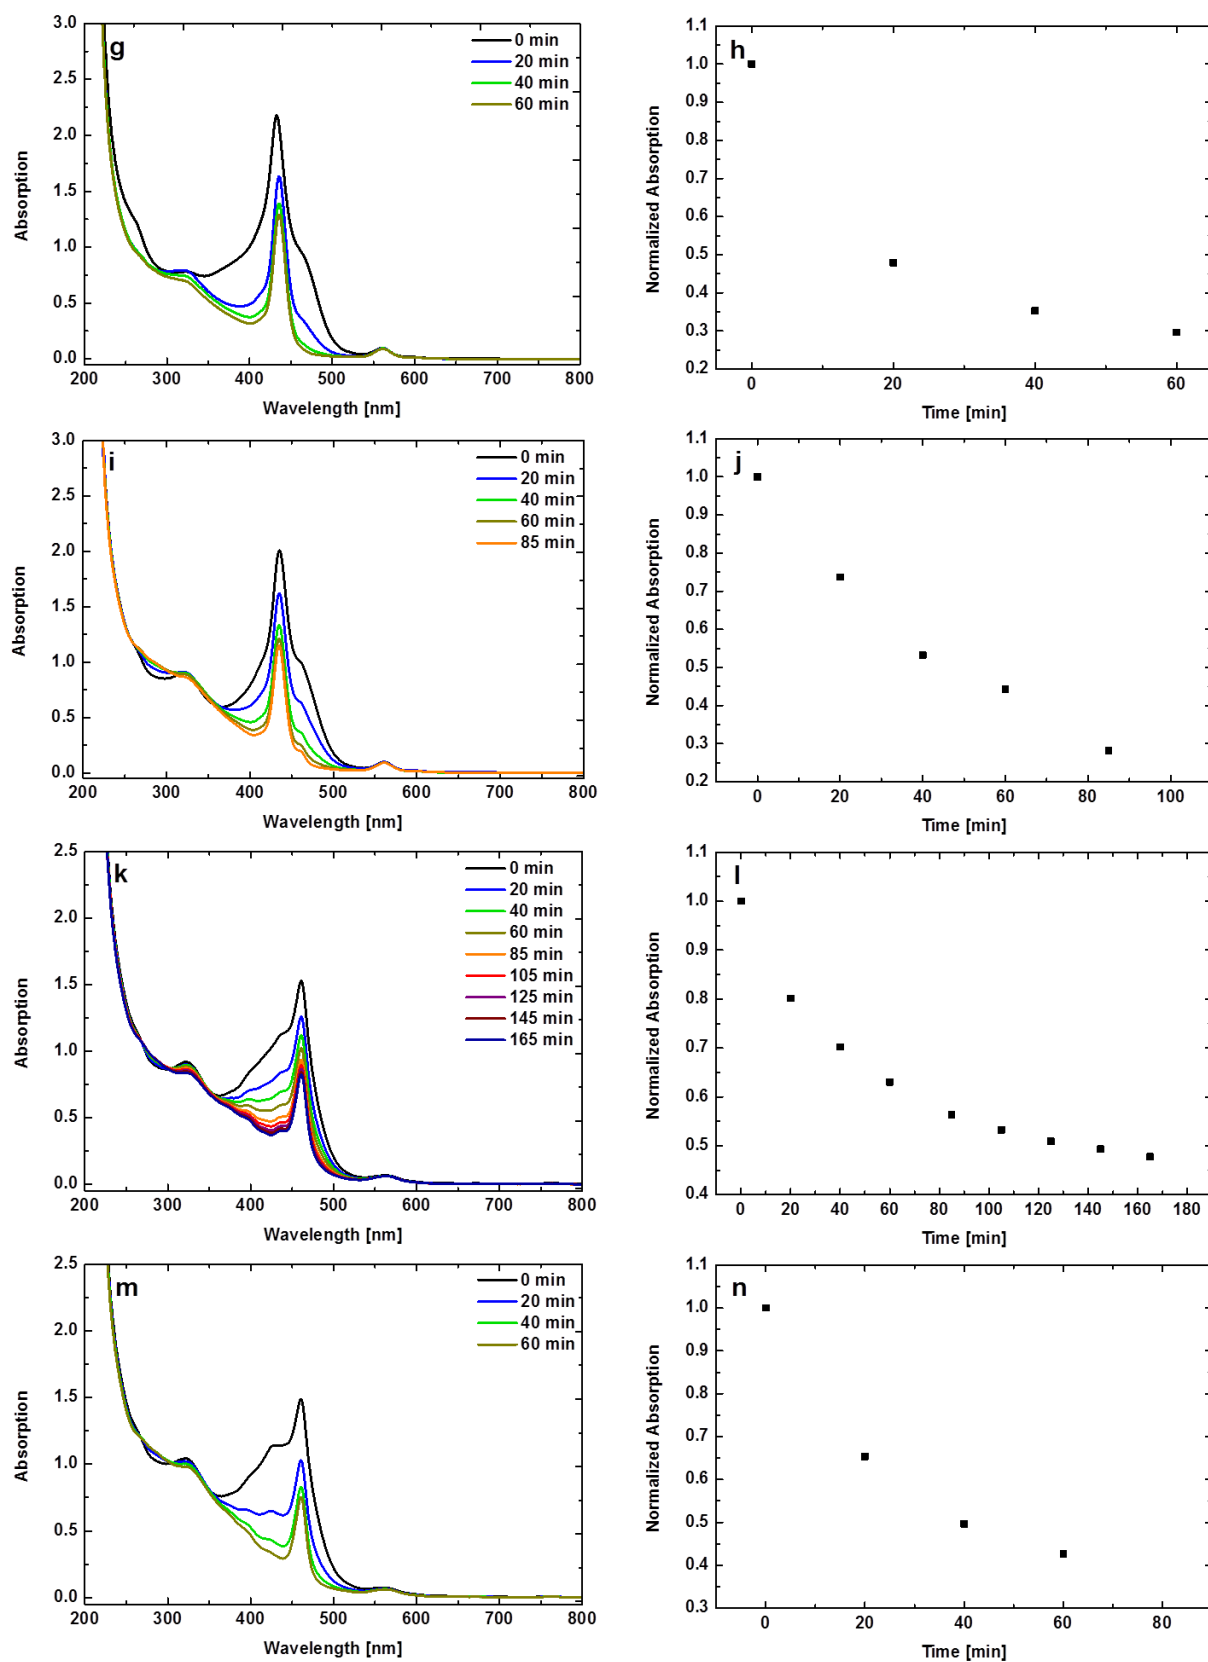

**Figure S4.** Absorption spectra of crocin with CdS-Core-shell zinc manganese mixtures of a) 100:0, c) 95:5, e) 67:33, g) 50:50, i) 33:67, k) 5:95 and m) 0:100 (Zn:Mn); normalized absorption values at 406.5 nm for the respective absorption spectra b) 100:0, d) 95:5, f) 67:33, h) 50:50, j) 33:67, l) 5:95 and n) 0:100 (Zn:Mn) in dependence of time.

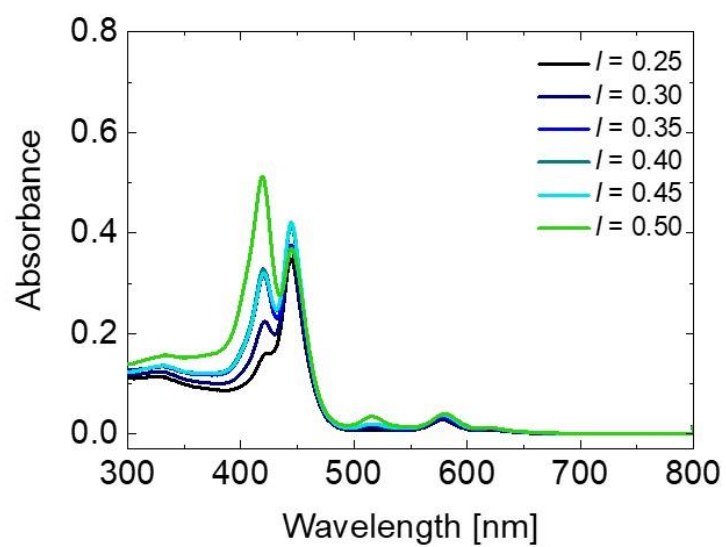

**Figure S5.** Absorption spectra of CdS-PAA100k particles assembled with TAPP at different loading ratios, with CdTAPP sitting atop complex with Soret band at  $\lambda = 447$  nm and TAPP Soret band at  $\lambda = 413$  nm. The surface is saturated and additional TAPP is not metalated anymore.
